# Supplementary material
Source: publisher figshare collection journal article supplement (https://sage.figshare.com/ndownloader/files/17543381)
Supplement: Supplementary file 1 [file 17543381]

## Measures

### Exchange and Communal Orientation

Read each statement below and indicate the extent to which it sounds like you.

1 = definitely does not sound like me

2 = does not sound like me

3 = neutral

4 = sounds like me

5 = definitely sounds like me

- \* 1. It bothers me when my partner neglects my needs.
- \* 2. When making a decision, I take my partner's needs and feelings into account.
- ^ 3. When I give something to my partner I generally expect something in return.
- \* R 4. I'm not especially sensitive to my partner's feelings.
- ^ 5. When my partner buys me a gift, I try to buy my partner as comparable a gift as possible.
- \* R 6. I don't consider myself to be a particularly helpful person to my partner.
- \* 7. I believe that my partner should go out of his/her way to be helpful to me.
- ^ R 8. I don't think that I should feel obligated to repay my partner for favors.
- ^ R 9. I wouldn't feel exploited if my partner failed to repay me for a favor.
- \* R 10. I don't especially enjoy giving my partner aid.
- ^ R 11. I don't bother to keep track of benefits I have given my partner.
- \* 12. I expect my partner to be responsive to my needs and feelings.
- \* 13. I often go out of my way to help my partner.
- \* R 14. I believe it's best not to get involved in taking care of my partner's personal needs.
- ^ 15. When my partner receives benefits from me, he/she ought to repay them right away.
- \* R 16. I'm not the sort of person who often comes to the aid of my partner.
- ^ 17. It's best to make sure things are always kept "even between myself and my partner.
- \* 18. When I have a need, I turn to my partner for help.
- \* R 19. When my partner gets emotionally upset, I tend to avoid him/her.
- ^ 20. I usually give gifts to my partner only when he/she has given me a gift.
- \* R 21. I believe my partner should keep his/her troubles to him/herself.
- ^ R 22. When my partner helps me out on a project, I don't feel I have to pay him/her back.
- \* 23. When I have a need that my partner ignores, I'm hurt.

---

\* Items from the communal orientation scale.

^ Items from the exchange orientation scale.

R reverse scored items.

### Daily Intimacy

Please use the following rating scales to characterize your relationship in the last 24 hours:

|                     |   |   |   |   |   |   |   |                         |
|---------------------|---|---|---|---|---|---|---|-------------------------|
| Physically intimate | 1 | 2 | 3 | 4 | 5 | 6 | 7 | Not physically intimate |
| Emotionally close   | 1 | 2 | 3 | 4 | 5 | 6 | 7 | Emotionally distant     |
| Connected           | 1 | 2 | 3 | 4 | 5 | 6 | 7 | Separated               |

### Profile of Mood States - Negative Evening Mood

Here is a list of feelings or experiences. Please rate the extent to which you feel or experience these RIGHT NOW, IN THE EVENING. Circle the appropriate number:

|               | Not at<br>all |     | A<br>little |     | Moder<br>ately |     | Quite<br>a bit |     | Extre-<br>mely |
|---------------|---------------|-----|-------------|-----|----------------|-----|----------------|-----|----------------|
| ^ On Edge     | 1             | 1.5 | 2           | 2.5 | 3              | 3.5 | 4              | 4.5 | 5              |
| + Sad         | 1             | 1.5 | 2           | 2.5 | 3              | 3.5 | 4              | 4.5 | 5              |
| ^ Uneasy      | 1             | 1.5 | 2           | 2.5 | 3              | 3.5 | 4              | 4.5 | 5              |
| * Annoyed     | 1             | 1.5 | 2           | 2.5 | 3              | 3.5 | 4              | 4.5 | 5              |
| ^ Anxious     | 1             | 1.5 | 2           | 2.5 | 3              | 3.5 | 4              | 4.5 | 5              |
| * Resentful   | 1             | 1.5 | 2           | 2.5 | 3              | 3.5 | 4              | 4.5 | 5              |
| * Angry       | 1             | 1.5 | 2           | 2.5 | 3              | 3.5 | 4              | 4.5 | 5              |
| + Discouraged | 1             | 1.5 | 2           | 2.5 | 3              | 3.5 | 4              | 4.5 | 5              |
| ^ Nervous     | 1             | 1.5 | 2           | 2.5 | 3              | 3.5 | 4              | 4.5 | 5              |
| * Peeved      | 1             | 1.5 | 2           | 2.5 | 3              | 3.5 | 4              | 4.5 | 5              |
| + Hopeless    | 1             | 1.5 | 2           | 2.5 | 3              | 3.5 | 4              | 4.5 | 5              |
| + Worthless   | 1             | 1.5 | 2           | 2.5 | 3              | 3.5 | 4              | 4.5 | 5              |

\* Items from the anger subscale

^ Items from the anxious subscale

+ Items from the depressed subscale

## References

- Clark, M. S., Oullette, R., Powell, M. C., & Milberg, S. (1987). Recipient's mood, relationship type, and helping. *Journal of Personality and Social Psychology*, 53(1), 94.  
<https://doi.org/10.1037/0022-3514.53.1.94>
- Clark, M. S., Taraban, C. B., Wesner, K., & Ho, J. (1989). A measure of exchange orientation and its relation to keeping track of inputs, reactions to receiving help, and styles of dividing rewards. *Unpublished Manuscript, Carnegie Mellon University, Pittsburgh, PA.*
- Mills, J., & Clark, M. S. (1994). Communal and exchange relationships: Controversies and research. In R. Erber & R. Gilmour (Eds.), *Theoretical Frameworks for Personal Relationships* (pp. 29–42). Lawrence Earlbaum Associates.
